# Supplementary material for: A novel strategy to synthesize hierarchical, porous carbohydrate-derived carbon with tunable properties
Source: Royal Society of Chemistry journal article supplement (doi:10.1039/c4nr03826f), 2014-01-01
Supplement: c4nr03826f1.pdf [file c4nr03826f1.pdf]

## Supplementary Data

### **A novel strategy to synthesize hierarchical porous carbohydrate-derived carbon with tunable properties**

**Shiping Wang,<sup>a</sup> Ruihan Liu,<sup>b</sup> Chuanlong Han,<sup>a</sup> Jing Wang,<sup>a</sup> Mingming Li,<sup>a</sup> Jia**

**Yao,<sup>\*b</sup> Haoran Li<sup>b</sup> and Yong Wang<sup>\*a</sup>**

<sup>a</sup>Carbon Nano Materials Group, Center for Chemistry of High-performance and Novel Materials, Department of Chemistry, Zhejiang University, Hangzhou 310028, P. R. China.

<sup>b</sup>State Key Laboratory of Chemical Engineering, Department of Chemistry, Zhejiang University, Hangzhou 310027, P. R. China.

---

\*Corresponding authors: Tel: +86 (0) 571 8857 3551.

E-mail address: [chemwy@zju.edu.cn](mailto:chemwy@zju.edu.cn) (Y Wang);

E-mail address: [yaojia@zju.edu.cn](mailto:yaojia@zju.edu.cn) (J Yao).

## 1. Supporting experimental details

### 1.1 Experiment and characterization of amphiphilic block copolymer P4VP-PEG

The synthesis of P4VP-PEG was prepared by the usual living anionic polymerization using potassium naphthalene as an initiator in tetrahydrofuran (THF) at -78 °C. 2.0 g dried MePEG-OH was dissolved in 100 mL THF, and added to a 250 mL round-bottomed flask under nitrogen. 4 mL freshly prepared potassium naphthalene in THF was dropped into the above reactor via a nitrogen-washed injector, until the solution color changed to light green. The mixture solution was stirred at room temperature for 0.5 h to form the alcoholate macroinitiator. Known amount of freshly distilled 4VP was then charged to the reactor under nitrogen atmosphere at -78 °C. Polymerization was carried out at this temperature for 24 h. The crude copolymer was dissolved in ethanol at 60 °C and was precipitated at room temperature. Then the copolymer was dissolved in ethanol at 60 °C again and was transferred to a dialysis tube and dialyzed against water for 1 week to remove all low molecular mass molecules.

In the spectrum of P4VP-PEG, the peaks at 3.5 ppm( $H_c$ ), 8.3 ppm( $H_e$ ) can be used to calculate the number-average molecular weight and the block ratio of the copolymer. We can simply calculate the block ratio using the following equations:

$$\frac{S_c}{S_e} = \frac{N_{H_c}}{N_{H_e}} = \frac{4n_{PEG}}{2n_{4VP}} = \frac{4 \times 2000/44}{2 \times n_{4VP}}$$

$$M_{\text{copolymer}} = 2000 + n_{4VP} \times M_{4VP}$$

Where S is the intensity of peaks in the  $^1H$  NMR spectrum; the  $n_{PEG}$  and  $n_{4VP}$  are the number of monomer repeat units along one copolymer backbone; the  $M_{\text{copolymer}}$  and  $M_{4VP}$  are the number-molecular weights for the copolymer and 4VP respectively.

From the calculation of the NMR spectrum, we found that one P4VP-PEG chain has 45 EO units and 141 4VP units.

**Table S1.** The characterization of P4VP-PEG

| Copolymer | EG <sup>a</sup> | 4-VP <sup>a</sup> | M <sub>n</sub> <sup>a</sup> | M <sub>n</sub> <sup>b</sup> | M <sub>w</sub> /M <sub>n</sub> <sup>b</sup> |
|-----------|-----------------|-------------------|-----------------------------|-----------------------------|---------------------------------------------|
| P4VP-PEG  | 45              | 141               | 16664                       | 17935                       | 2.59                                        |

<sup>a</sup>The calculated monomer repeat units and molecular weights obtained by <sup>1</sup>H NMR spectra.

<sup>b</sup>The molecular weights and distributions from GPC traces.

## 1.2 The preparation parameters of different samples

**Table S2.** The preparation parameters of diverse carbon materials

| <b>Sample Name</b>      | <b>Water/Ethanol<br/>(mL/mL)</b> | <b>P4VP-PEG<br/>(g mL<sup>-1</sup>)</b> | <b>Fructose<br/>(g mL<sup>-1</sup>)</b> | <b>pH</b> |
|-------------------------|----------------------------------|-----------------------------------------|-----------------------------------------|-----------|
| <b>Contrast</b>         | 9/6                              | 0                                       | 0.27                                    | 7         |
| <b>HPC-1.5@0.025-7</b>  | 9/6                              | 0.01                                    | 0.40                                    | 7         |
| <b>HPC-1.5@0.037-7</b>  | 9/6                              | 0.01                                    | 0.27                                    | 7         |
| <b>HPC-1.5@0.074-7</b>  | 9/6                              | 0.02                                    | 0.27                                    | 7         |
| <b>HPC-1.5@0.111-7</b>  | 9/6                              | 0.03                                    | 0.27                                    | 7         |
| <b>HPC-1.5@0.037-3</b>  | 9/6                              | 0.01                                    | 0.27                                    | 3         |
| <b>HPC-1.5@0.037-2</b>  | 9/6                              | 0.01                                    | 0.27                                    | 2         |
| <b>HPC-4@0.037-2</b>    | 12/3                             | 0.01                                    | 0.27                                    | 2         |
| <b>HPC-0.67@0.037-2</b> | 6/9                              | 0.01                                    | 0.27                                    | 2         |
| <b>HPC-1.5@0.077-2</b>  | 9/6                              | 0.01                                    | 0.13                                    | 2         |
| <b>HPC-4@0.037-7</b>    | 12/3                             | 0.01                                    | 0.27                                    | 7         |
| <b>HPC-0.67@0.037-7</b> | 6/9                              | 0.01                                    | 0.27                                    | 7         |

## 2. Supporting figures

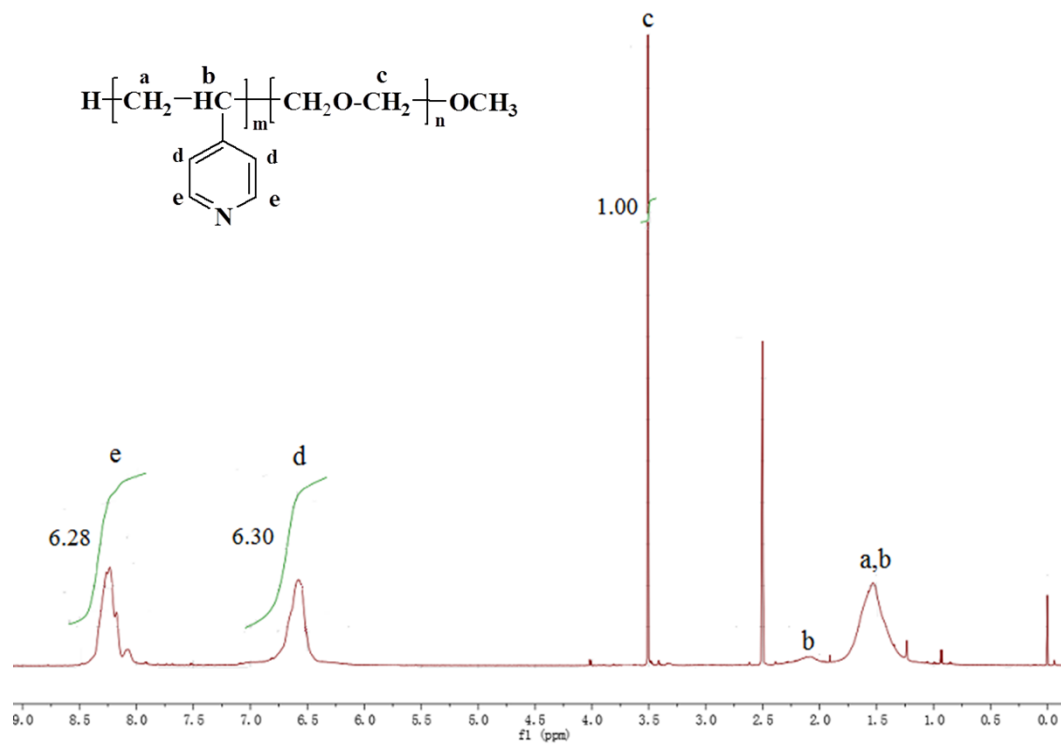

**Fig. S1**  $^1\text{H}$  NMR spectrum of the synthesized P4VP-PEG block copolymer in  $\text{DMSO-}d_6$ .

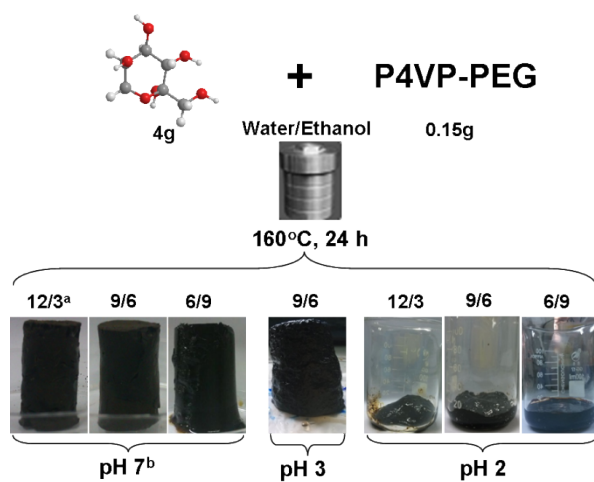

<sup>a</sup> the volume ratio of water/ ethanol

<sup>b</sup> the pH value of the reaction solutions.

**Fig. S2** The photos of hydrothermal carbon prepared at various parameters.

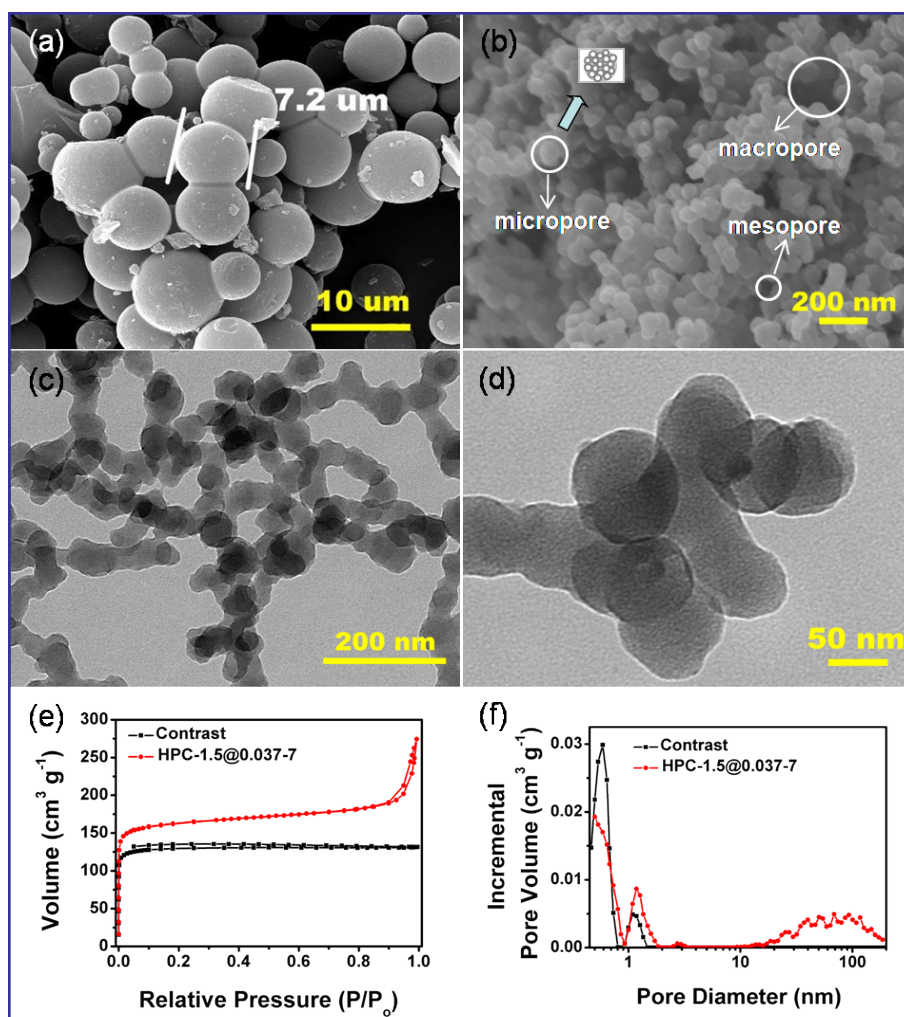

**Fig. S3** (a) The SEM image of contrast sample prepared under the same conditions of sample HPC-1.5@0.037-7 but without the addition of P4VP-PEG. (b) The SEM image of sample HPC-1.5@0.037-7, showing the hierarchical porous structures of the obtained carbon materials (inset is a schematic illustration of micropores in the carbon particles). The TEM image (c) and relatively higher magnification TEM (d) of sample HPC-1.5@0.037-7. The N<sub>2</sub> sorption isotherms (e) and the pore diameter distributions (f) of the contrast sample and sample HPC-1.5@0.037-7.

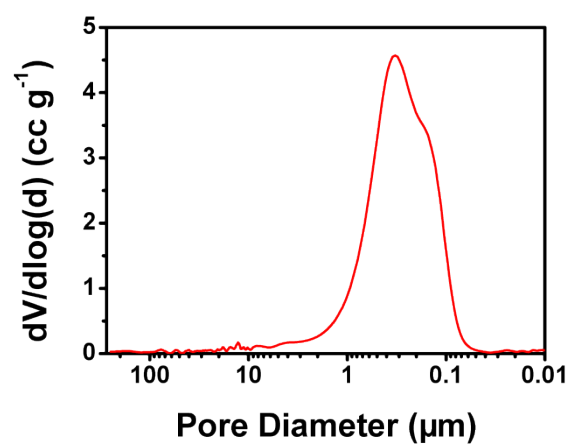

**Fig. S4** The macropore diameter distribution of sample HPC-1.5@0.025-7.



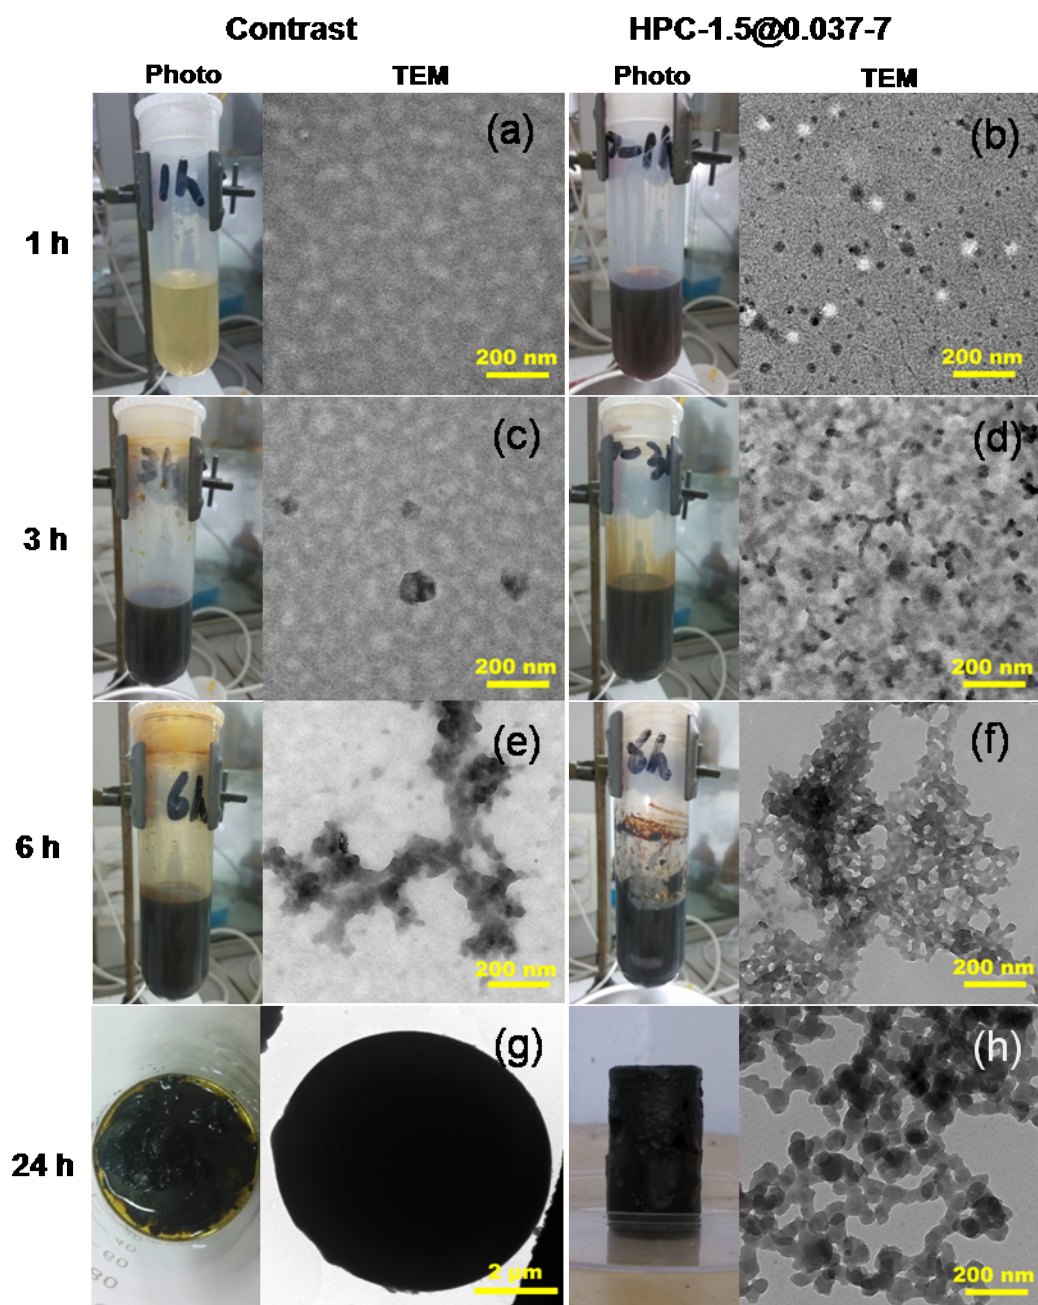

**Fig. S5** The photos and TEM images of hydrothermal products prepared with or without the addition of P4VP-PEG for different hydrothermal time under a water/ethanol ratio of 1.5, a fructose concentration of  $0.27 \text{ g mL}^{-1}$  at pH 7.

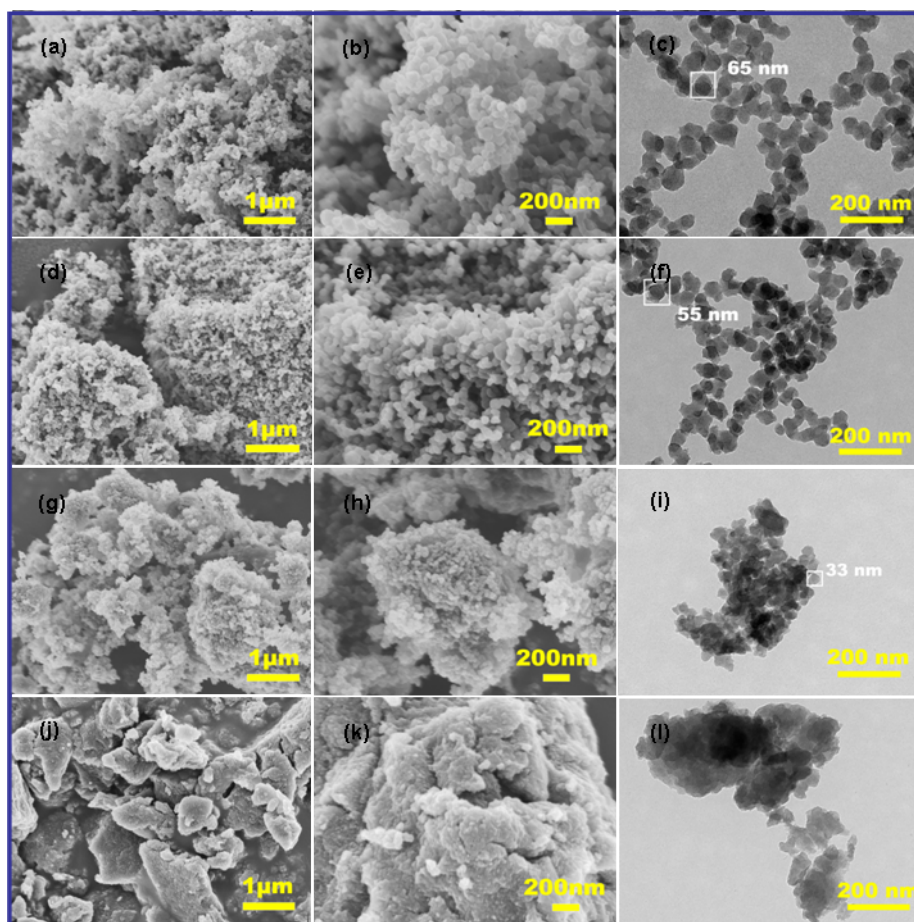

**Fig. S6** The SEM and TEM images of samples prepared at different P4VP-PEG concentrations: (a-c) sample HPC-1.5@0.074-7; (d-f) sample HPC-1.5@0.111-7. The SEM and TEM images of samples prepared at different volume ratio of water/ethanol: (g-i) sample HPC-4@0.037-2; (j-l) sample HPC-0.67@0.037-2.

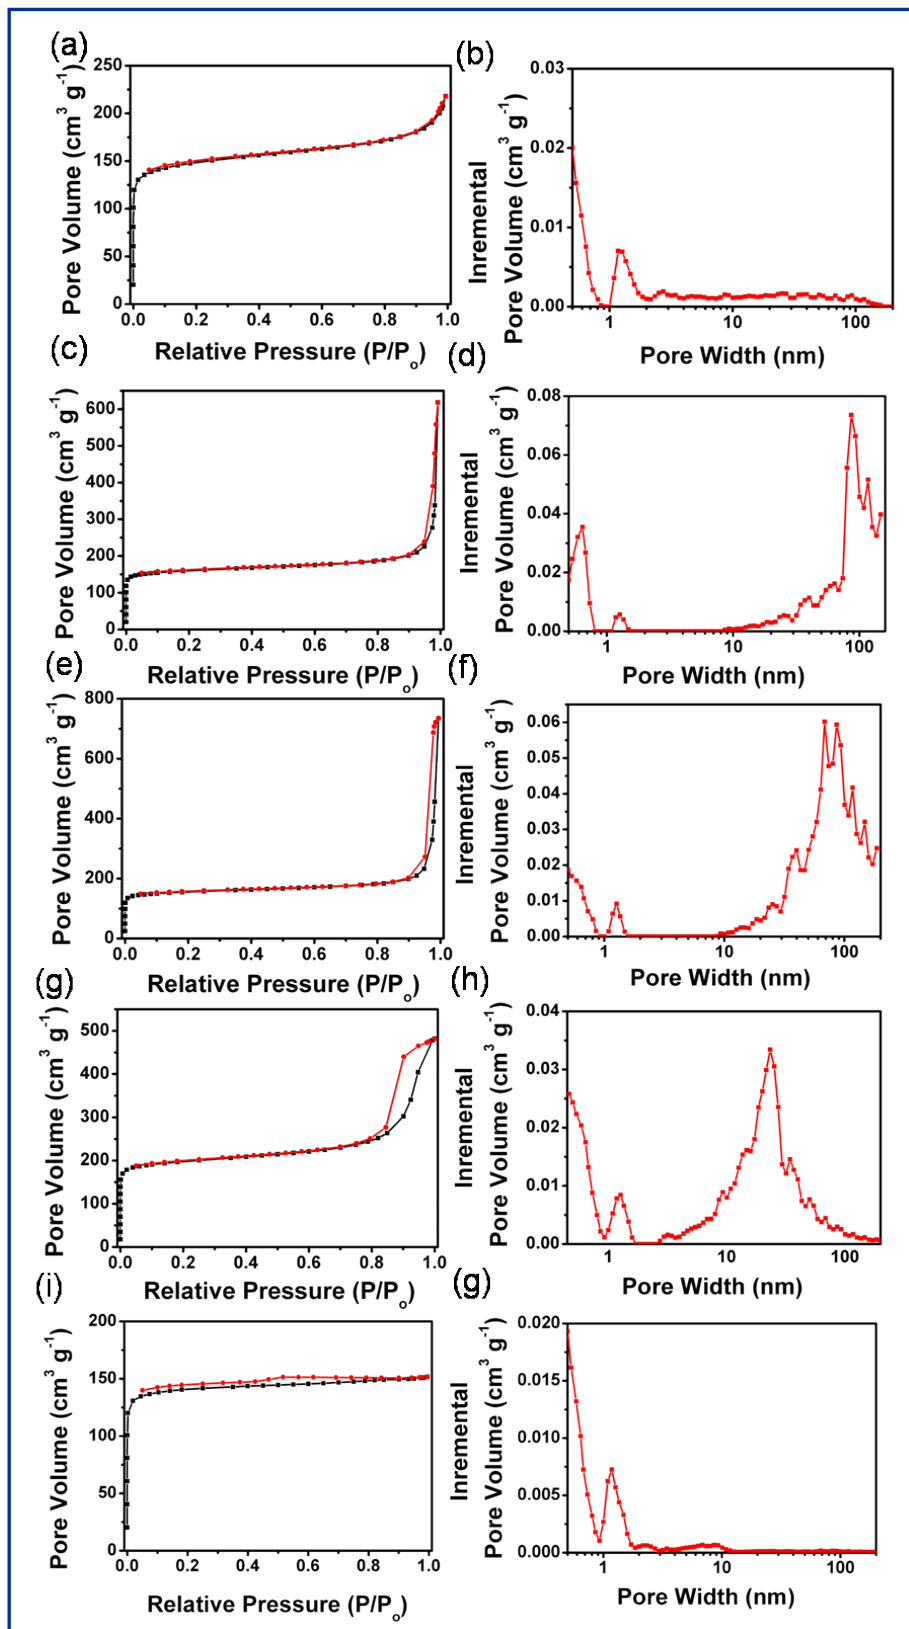

**Fig. S7** The  $N_2$  sorption isotherms and pore width distributions of sample HPC-

---

1.5@0.025-7 (a, b), sample HPC-1.5@0.074-7 (c, d), sample HPC-1.5@0.111-7 (e, f),  
sample HPC-4@0.037-2 (g, h) and sample HPC-0.67@0.037-2 (i, j).

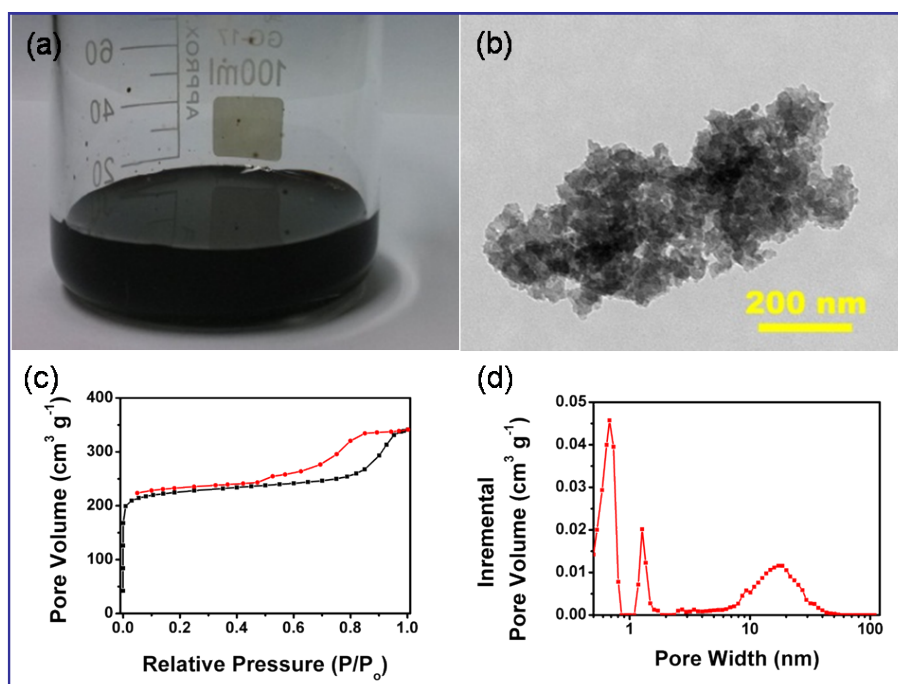

**Fig. S8** The characterizations of sample HPC-1.5@0.077-2 prepared under a water/ethanol volume ratio of 1.5, a P4VP-PEG concentration of 0.01 g mL<sup>-1</sup> and a fructose concentration of 0.13 g mL<sup>-1</sup> at pH 2: (a) the photo of sol-like hydrothermal products; (b) TEM image; (c) N<sub>2</sub> sorption isotherm; (d) the graph of pore diameter distribution.

Fig. S8 a evidenced that sol solution was prepared after hydrothermal treating the solution under a water/ethanol volume ratio of 1.5, a P4VP-PEG concentration of 0.01 g mL<sup>-1</sup> and a fructose concentration of 0.13 g mL<sup>-1</sup> at pH 2. Then, hierarchical porous carbon materials were obtained by a calcination process (Fig. S7 b, c, d).

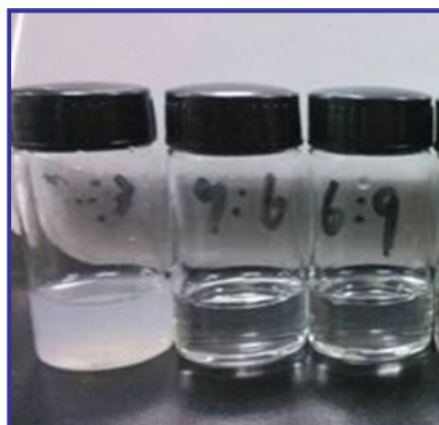

**Fig. S9** The mixed solutions prepared with different water/ethanol volume ratios (4, 1.5, 0.67) under a P4VP-PEG concentration of  $0.01 \text{ g mL}^{-1}$  and a fructose of  $0.27 \text{ g mL}^{-1}$  at pH 7.

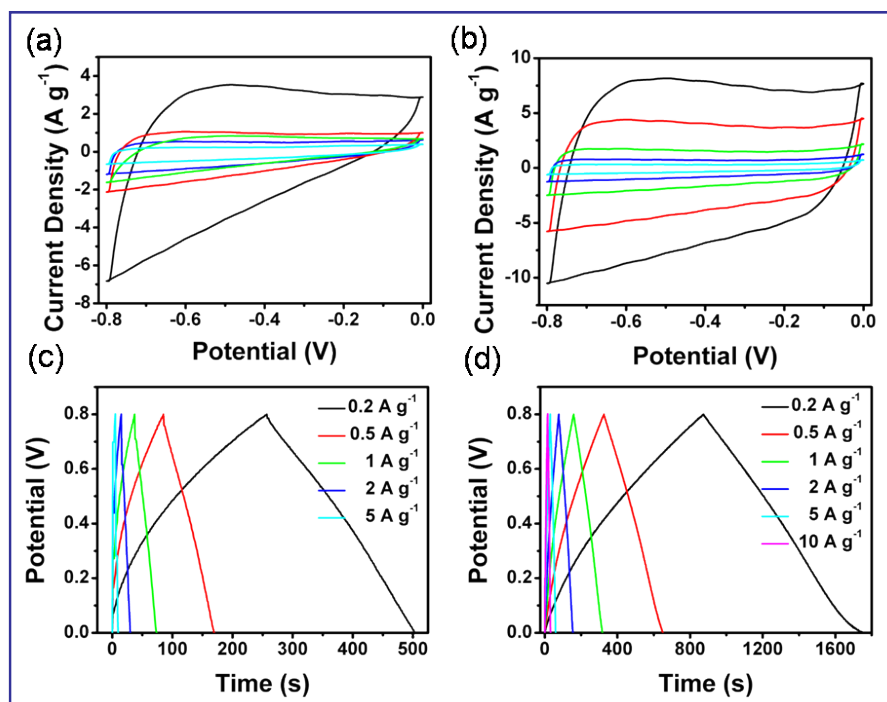

**Fig. S10** The cyclic voltammetry of the contrast carbon (a) and sample HPC-1.5@0.077-2 (b) measured in 6 M KOH at varying scanning speeds: 100 mV s<sup>-1</sup> (black), 50 mV s<sup>-1</sup>(red), 20 mV s<sup>-1</sup> (green), 10 mV s<sup>-1</sup> (blue), 5 mV s<sup>-1</sup> (sky blue). The galvanostatic charge/discharge curves of contrast carbon (c) and sample HPC-1.5@0.077-2 (d) measured in 6 M KOH at varying current densities.
